# Supplementary material for: Inferring neutral winds in the ionospheric transition region from AGW-TID observations with the EISCAT VHF radar and the Nordic Meteor Radar Cluster
Source: Copernicus journal article supplement (doi:10.5194/egusphere-2023-678), 2023-04-14

example wind field from two interfering modes ("checkers pattern")

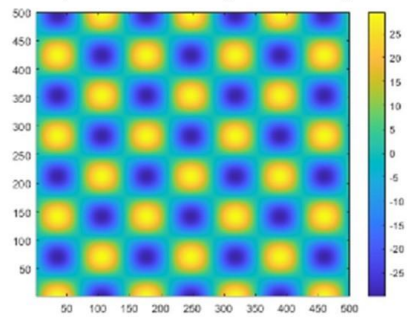

**2D FFT**

2D Fourier spectrum

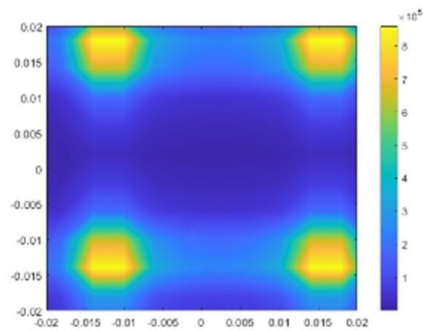

**2D Heaviside filter**

2D Fourier spectrum filtered by propagation direction

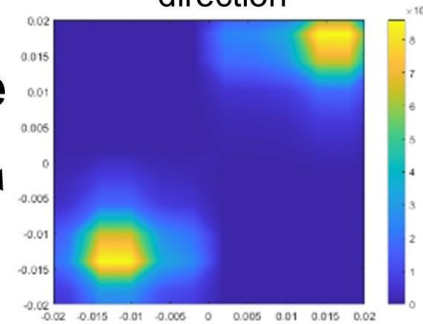

**2D IFFT**

wind fields from retransformed filtered Fourier spectra

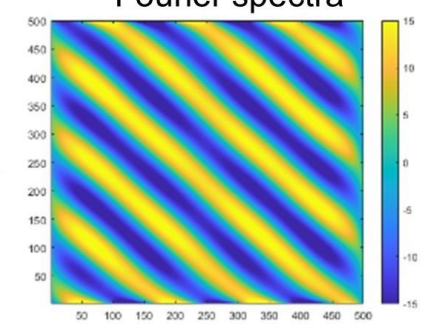

Supplement: Supplementary file [file egusphere-2023-678-AC1-supplement.pdf]
